# Supplementary material for: Luxembourgite, AgCuPbBi&lt;sub&gt;4&lt;/sub&gt;Se&lt;sub&gt;8&lt;/sub&gt;, a new mineral species from Bivels, Grand Duchy of Luxembourg
Source: Copernicus journal article supplement (doi:10.5194/ejm-32-449-2020), 2020-08-12
Supplement: Supplementary file 1 [file ejm-32-449-2020-supplement.zip]

Archive with 2 entries (2 files):
- Fibre-SP.cif
- ejm-32-449-2020-supplement-title-page.pdf
