# Supplementary material for: Luxembourgite, AgCuPbBi&lt;sub&gt;4&lt;/sub&gt;Se&lt;sub&gt;8&lt;/sub&gt;, a new mineral species from Bivels, Grand Duchy of Luxembourg
Source: Copernicus journal article supplement (doi:10.5194/ejm-32-449-2020), 2020-08-12
Supplement: Supplementary file 1 [file ejm-32-449-2020-supplement.zip › ejm-32-449-2020-supplement-title-page.pdf]

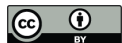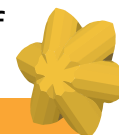

*Supplement of*

**Luxembourgite,  $\text{AgCuPbBi}_4\text{Se}_8$ , a new mineral species from Bivels, Grand Duchy of Luxembourg**

**Simon Philippo et al.**

*Correspondence to:* Frédéric Hatert (fhatert@uliege.be)

- [ejm-32-449-2020-supplement-title-page.pdf](#)
- [Fibre-SP.cif](#)

The copyright of individual parts of the supplement might differ from the CC BY 4.0 License.
