# Supplementary material for: Luxembourgite, AgCuPbBi&lt;sub&gt;4&lt;/sub&gt;Se&lt;sub&gt;8&lt;/sub&gt;, a new mineral species from Bivels, Grand Duchy of Luxembourg
Source: Copernicus journal article supplement (doi:10.5194/ejm-32-449-2020), 2020-08-12
Supplement: Supplementary file 1 [file ejm-32-449-2020-supplement.zip › Fibre-SP.cif]

data_fibre-sp
_audit_creation_date              2020-06-19
_audit_creation_method
;
  Olex2 1.1
  (compiled 2011.02.15 svn.r1672, GUI svn.r3494)
;
_chemical_name_common             ?
_chemical_name_systematic
;
 ? 
;
_chemical_formula_moiety          '2(Ag0.5 Bi1.9886 Cu0.4826 Pb0.4945 Se4)'
_chemical_formula_sum             'Ag2 Bi4 Cu0.50 O0.50 Pb S4 Se4'
_chemical_formula_weight          1742.70
_chemical_melting_point           ?
_chemical_oxdiff_formula          'Ag2 Pb Bi4 Se4 S4'
loop_
  _atom_type_symbol
  _atom_type_description
  _atom_type_scat_dispersion_real
  _atom_type_scat_dispersion_imag
  _atom_type_scat_source
 'Ag' 'Ag' -0.8971 1.1015
 'International Tables Vol C Tables 4.2.6.8 and 6.1.1.4'
 'Bi' 'Bi' -4.1077 10.2566
 'International Tables Vol C Tables 4.2.6.8 and 6.1.1.4'
 'O' 'O' 0.0106 0.0060 'International Tables Vol C Tables 4.2.6.8 and 6.1.1.4'
 'Pb' 'Pb' -3.3944 10.1111
 'International Tables Vol C Tables 4.2.6.8 and 6.1.1.4'
 'S' 'S' 0.1246 0.1234 'International Tables Vol C Tables 4.2.6.8 and 6.1.1.4'
 'Se' 'Se' -0.0929 2.2259
 'International Tables Vol C Tables 4.2.6.8 and 6.1.1.4'
 'Cu' 'Cu' 0.3201 1.2651 'International Tables Vol C Tables 4.2.6.8 and 6.1.1.4'

_space_group_crystal_system       'monoclinic'
_space_group_IT_number            11
_space_group_name_H-M_alt         'P 1 21/m 1'
_space_group_name_Hall            '-P 2yb'
loop_
  _space_group_symop_id
  _space_group_symop_operation_xyz
 1 'x, y, z'
 2 '-x, y+1/2, -z'
 3 '-x, -y, -z'
 4 'x, -y-1/2, z'

_cell_length_a                    13.0019(14)
_cell_length_b                    4.1543(3)
_cell_length_c                    15.312(2)
_cell_angle_alpha                 90.00
_cell_angle_beta                  108.917(12)
_cell_angle_gamma                 90.00
_cell_volume                      782.39(14)
_cell_formula_units_Z             2
_cell_measurement_reflns_used     1179
_cell_measurement_temperature     566(2)
_cell_measurement_theta_max       28.7767
_cell_measurement_theta_min       2.4908
_exptl_absorpt_coefficient_mu     68.456
_exptl_absorpt_correction_T_max   1.00000
_exptl_absorpt_correction_T_min   0.36309
_exptl_absorpt_correction_type    multi-scan
_exptl_absorpt_process_details
;
CrysAlisPro, Agilent Technologies,
Version 1.171.35.21 (release 20-01-2012 CrysAlis171 .NET)
(compiled Jan 23 2012,18:06:46)
Empirical absorption correction using spherical harmonics,
 implemented in SCALE3 ABSPACK scaling algorithm.
;
_exptl_crystal_colour             ?
_exptl_crystal_density_diffrn     7.397
_exptl_crystal_density_meas       ?
_exptl_crystal_density_method     'not measured'
_exptl_crystal_description        ?
_exptl_crystal_F_000              1453
_exptl_crystal_size_max           ?
_exptl_crystal_size_mid           ?
_exptl_crystal_size_min           ?
_exptl_special_details
;
 ? 
;
_diffrn_reflns_av_R_equivalents   0.0408
_diffrn_reflns_av_unetI/netI      0.0629
_diffrn_reflns_limit_h_max        17
_diffrn_reflns_limit_h_min        -16
_diffrn_reflns_limit_k_max        5
_diffrn_reflns_limit_k_min        -4
_diffrn_reflns_limit_l_max        14
_diffrn_reflns_limit_l_min        -19
_diffrn_reflns_number             5904
_diffrn_reflns_theta_full         28.84
_diffrn_reflns_theta_max          28.84
_diffrn_reflns_theta_min          2.50
_diffrn_ambient_temperature       566(2)
_diffrn_detector_area_resol_mean  16.0087
_diffrn_measured_fraction_theta_full 0.907
_diffrn_measured_fraction_theta_max 0.907
_diffrn_measurement_details
;
#__ type_ start__ end____ width___ exp.time_
  1 omega  -19.00   23.00   1.0000   20.0000
omega____ theta____ kappa____ phi______ frames
    -      -18.2442  -99.0000  -30.0000 42

#__ type_ start__ end____ width___ exp.time_
  2 omega   -7.00   86.00   1.0000   20.0000
omega____ theta____ kappa____ phi______ frames
    -       18.3223   37.0000  150.0000 93

#__ type_ start__ end____ width___ exp.time_
  3 omega   47.00   88.00   1.0000   20.0000
omega____ theta____ kappa____ phi______ frames
    -       18.3223  178.0000   30.0000 41

#__ type_ start__ end____ width___ exp.time_
  4 omega   -3.00   87.00   1.0000   20.0000
omega____ theta____ kappa____ phi______ frames
    -       18.3223   57.0000 -120.0000 90

#__ type_ start__ end____ width___ exp.time_
  5 omega  -53.00   42.00   1.0000   20.0000
omega____ theta____ kappa____ phi______ frames
    -       18.3223  -37.0000  -30.0000 95
;
_diffrn_measurement_device_type   'Xcalibur, Eos'
_diffrn_measurement_method        '\w scans'
_diffrn_orient_matrix_UB_11       0.0275362000
_diffrn_orient_matrix_UB_12       0.0261442000
_diffrn_orient_matrix_UB_13       -0.0325060000
_diffrn_orient_matrix_UB_21       0.0495169000
_diffrn_orient_matrix_UB_22       0.0208445000
_diffrn_orient_matrix_UB_23       0.0367984000
_diffrn_orient_matrix_UB_31       0.0104449000
_diffrn_orient_matrix_UB_32       -0.1672651000
_diffrn_orient_matrix_UB_33       -0.0003721000
_diffrn_radiation_monochromator   graphite
_diffrn_radiation_type            'Mo K\a'
_diffrn_radiation_wavelength      0.7107
_diffrn_source                    'Enhance (Mo) X-ray Source'
_diffrn_standards_decay_%         ?
_diffrn_standards_interval_count  ?
_diffrn_standards_interval_time   ?
_diffrn_standards_number          ?
_reflns_number_gt                 1603
_reflns_number_total              2117
_reflns_odcompleteness_completeness 99.84
_reflns_odcompleteness_iscentric  1
_reflns_odcompleteness_theta      26.32
_reflns_threshold_expression      >2sigma(I)
_computing_cell_refinement
;
CrysAlisPro, Agilent Technologies,
Version 1.171.35.21 (release 20-01-2012 CrysAlis171 .NET)
(compiled Jan 23 2012,18:06:46)
;
_computing_data_collection
;
CrysAlisPro, Agilent Technologies,
Version 1.171.35.21 (release 20-01-2012 CrysAlis171 .NET)
(compiled Jan 23 2012,18:06:46)
;
_computing_data_reduction
;
CrysAlisPro, Agilent Technologies,
Version 1.171.35.21 (release 20-01-2012 CrysAlis171 .NET)
(compiled Jan 23 2012,18:06:46)
;
_computing_molecular_graphics
;
O. V. Dolomanov, L. J. Bourhis, R. J. Gildea, J. A. K. Howard and H. Puschmann,
OLEX2: a complete structure solution, refinement and analysis program.
J. Appl. Cryst. (2009). 42, 339-341.
;
_computing_publication_material
;
O. V. Dolomanov, L. J. Bourhis, R. J. Gildea, J. A. K. Howard and H. Puschmann,
OLEX2: a complete structure solution, refinement and analysis program.
J. Appl. Cryst. (2009). 42, 339-341.
;
_computing_structure_refinement   'SHELXL-97 (Sheldrick, 1997)'
_computing_structure_solution     'A short history of SHELX (Sheldrick, 2007)'
_refine_diff_density_max          5.318
_refine_diff_density_min          -2.415
_refine_diff_density_rms          0.681
_refine_ls_extinction_coef        ?
_refine_ls_extinction_method      none
_refine_ls_goodness_of_fit_ref    1.077
_refine_ls_hydrogen_treatment     mixed
_refine_ls_matrix_type            full
_refine_ls_number_parameters      94
_refine_ls_number_reflns          2117
_refine_ls_number_restraints      0
_refine_ls_R_factor_all           0.0730
_refine_ls_R_factor_gt            0.0476
_refine_ls_restrained_S_all       1.077
_refine_ls_shift/su_max           0.000
_refine_ls_shift/su_mean          0.000
_refine_ls_structure_factor_coef  Fsqd
_refine_ls_weighting_details
'calc w=1/[\s^2^(Fo^2^)+(0.0408P)^2^+0.0000P] where P=(Fo^2^+2Fc^2^)/3'
_refine_ls_weighting_scheme       calc
_refine_ls_wR_factor_gt           0.0959
_refine_ls_wR_factor_ref          0.1069
_refine_special_details
;
 Refinement of F^2^ against ALL reflections.  The weighted R-factor wR and 
 goodness of fit S are based on F^2^, conventional R-factors R are based 
 on F, with F set to zero for negative F^2^. The threshold expression of 
 F^2^ > 2sigma(F^2^) is used only for calculating R-factors(gt) etc. and is 
 not relevant to the choice of reflections for refinement.  R-factors based 
 on F^2^ are statistically about twice as large as those based on F, and R- 
 factors based on ALL data will be even larger. 
;
_atom_sites_solution_hydrogens    geom
_atom_sites_solution_primary      direct
_atom_sites_solution_secondary    difmap
loop_
  _atom_site_label
  _atom_site_type_symbol
  _atom_site_fract_x
  _atom_site_fract_y
  _atom_site_fract_z
  _atom_site_U_iso_or_equiv
  _atom_site_adp_type
  _atom_site_occupancy
  _atom_site_symmetry_multiplicity
  _atom_site_calc_flag
  _atom_site_refinement_flags
  _atom_site_disorder_assembly
  _atom_site_disorder_group
 Bi4 Bi 0.92273(8) 0.2500 0.37980(8) 0.0216(3) Uani 0.977(4) 2 d SP . .
 Se5 Se 0.38321(18) 0.7500 0.29286(17) 0.0144(5) Uani 1 2 d S . .
 Se6 Se 0.63688(18) 0.2500 0.48353(17) 0.0166(5) Uani 1 2 d S . .
 Se3 Se 0.70090(18) 0.7500 0.27334(18) 0.0157(5) Uani 1 2 d S . .
 Se2 Se 0.13389(17) 0.2500 0.11537(17) 0.0149(5) Uani 1 2 d S . .
 Se4 Se 0.43973(18) 0.2500 0.07742(17) 0.0140(5) Uani 1 2 d S . .
 Cu2 Cu 0.4701(3) 0.2500 0.5342(3) 0.0302(12) Uani 0.965(10) 2 d SP . .
 Se7 Se 0.80747(18) 0.2500 0.11398(17) 0.0150(5) Uani 1 2 d S . .
 Se8 Se 0.04394(17) 0.7500 0.30193(17) 0.0139(5) Uani 1 2 d S . .
 Bi3 Bi 0.29452(7) 0.7500 0.09483(7) 0.0159(2) Uani 1 2 d S . .
 Pb Pb 0.23164(8) 0.2500 0.32905(9) 0.0303(4) Uani 0.989(4) 2 d SP . .
 Bi2 Bi 0.56485(7) 0.2500 0.29515(7) 0.0162(2) Uani 1 2 d S . .
 Ag1 Ag 0.62177(17) 0.7500 0.09956(16) 0.0365(5) Uani 1 2 d S . .
 Bi1 Bi 0.95615(7) 0.7500 0.11227(7) 0.0155(2) Uani 1 2 d S . .
 Se1 Se 0.87488(18) 0.7500 0.49204(17) 0.0149(5) Uani 1 2 d S . .

loop_
  _atom_site_aniso_label
  _atom_site_aniso_U_11
  _atom_site_aniso_U_22
  _atom_site_aniso_U_33
  _atom_site_aniso_U_23
  _atom_site_aniso_U_13
  _atom_site_aniso_U_12
 Bi4 0.0172(5) 0.0179(5) 0.0277(7) 0.000 0.0045(4) 0.000
 Se5 0.0139(11) 0.0135(10) 0.0159(14) 0.000 0.0050(10) 0.000
 Se6 0.0158(12) 0.0177(11) 0.0145(14) 0.000 0.0024(10) 0.000
 Se3 0.0119(11) 0.0139(10) 0.0199(15) 0.000 0.0034(10) 0.000
 Se2 0.0122(11) 0.0124(10) 0.0213(15) 0.000 0.0071(10) 0.000
 Se4 0.0145(11) 0.0135(10) 0.0148(14) 0.000 0.0061(10) 0.000
 Cu2 0.033(2) 0.0180(17) 0.047(3) 0.000 0.0230(19) 0.000
 Se7 0.0139(11) 0.0141(11) 0.0176(14) 0.000 0.0059(10) 0.000
 Se8 0.0147(11) 0.0137(10) 0.0133(14) 0.000 0.0043(10) 0.000
 Bi3 0.0150(4) 0.0128(4) 0.0199(6) 0.000 0.0056(4) 0.000
 Pb 0.0280(6) 0.0190(5) 0.0466(9) 0.000 0.0161(6) 0.000
 Bi2 0.0163(5) 0.0143(4) 0.0169(6) 0.000 0.0038(4) 0.000
 Ag1 0.0357(13) 0.0582(14) 0.0143(12) 0.000 0.0063(10) 0.000
 Bi1 0.0164(4) 0.0131(4) 0.0170(6) 0.000 0.0055(4) 0.000
 Se1 0.0156(11) 0.0138(10) 0.0145(14) 0.000 0.0037(10) 0.000

_geom_special_details
;
 All esds (except the esd in the dihedral angle between two l.s. planes) 
 are estimated using the full covariance matrix.  The cell esds are taken 
 into account individually in the estimation of esds in distances, angles 
 and torsion angles; correlations between esds in cell parameters are only 
 used when they are defined by crystal symmetry.  An approximate (isotropic) 
 treatment of cell esds is used for estimating esds involving l.s. planes. 
;
loop_
  _geom_bond_atom_site_label_1
  _geom_bond_atom_site_label_2
  _geom_bond_distance
  _geom_bond_site_symmetry_2
  _geom_bond_publ_flag
 Bi4 Se8 3.0720(16) 1_655 ?
 Bi4 Se8 3.0720(16) 1_645 ?
 Bi4 Se1 2.725(3) 3_766 ?
 Bi4 Se1 2.8895(17) 1_545 ?
 Bi4 Se1 2.8895(17) . ?
 Se5 Cu2 2.715(5) 3_666 ?
 Se5 Bi3 2.873(3) . ?
 Se5 Pb 3.0354(16) . ?
 Se5 Pb 3.0354(16) 1_565 ?
 Se5 Bi2 3.1367(16) . ?
 Se5 Bi2 3.1368(16) 1_565 ?
 Se6 Cu2 2.465(2) 3_656 ?
 Se6 Cu2 2.465(2) 3_666 ?
 Se6 Cu2 2.529(4) . ?
 Se6 Bi2 2.729(3) . ?
 Se3 Bi2 2.8174(15) 1_565 ?
 Se3 Bi2 2.8175(15) . ?
 Se3 Ag1 2.523(3) . ?
 Se2 Bi3 3.0333(15) 1_545 ?
 Se2 Bi3 3.0333(15) . ?
 Se2 Pb 3.102(3) . ?
 Se2 Bi1 3.0962(16) 1_455 ?
 Se2 Bi1 3.0962(16) 1_445 ?
 Se4 Bi3 2.8769(15) 1_545 ?
 Se4 Bi3 2.8769(15) . ?
 Se4 Bi2 3.201(3) . ?
 Se4 Ag1 3.084(2) 1_545 ?
 Se4 Ag1 3.084(2) . ?
 Se4 Ag1 2.565(3) 3_665 ?
 Cu2 Se5 2.715(5) 3_666 ?
 Cu2 Se6 2.465(2) 3_656 ?
 Cu2 Se6 2.465(2) 3_666 ?
 Cu2 Cu2 2.559(4) 3_656 ?
 Cu2 Cu2 2.559(4) 3_666 ?
 Se7 Bi3 3.038(3) 3_665 ?
 Se7 Bi1 2.8435(15) . ?
 Se7 Bi1 2.8434(15) 1_545 ?
 Se8 Bi4 3.0720(16) 1_465 ?
 Se8 Bi4 3.0720(16) 1_455 ?
 Se8 Pb 3.1283(17) 1_565 ?
 Se8 Pb 3.1283(17) . ?
 Se8 Bi1 2.755(3) 1_455 ?
 Bi3 Se2 3.0333(15) 1_565 ?
 Bi3 Se4 2.8769(15) 1_565 ?
 Bi3 Se7 3.038(3) 3_665 ?
 Pb Se5 3.0354(16) 1_545 ?
 Pb Se8 3.1283(17) 1_545 ?
 Bi2 Se5 3.1367(16) 1_545 ?
 Bi2 Se3 2.8175(15) 1_545 ?
 Ag1 Se4 2.565(3) 3_665 ?
 Ag1 Se4 3.084(2) 1_565 ?
 Bi1 Se2 3.0962(16) 1_655 ?
 Bi1 Se2 3.0962(16) 1_665 ?
 Bi1 Se7 2.8435(15) 1_565 ?
 Bi1 Se8 2.755(3) 1_655 ?
 Se1 Bi4 2.8895(17) 1_565 ?
 Se1 Bi4 2.725(3) 3_766 ?

loop_
  _geom_angle_atom_site_label_1
  _geom_angle_atom_site_label_2
  _geom_angle_atom_site_label_3
  _geom_angle
  _geom_angle_site_symmetry_1
  _geom_angle_site_symmetry_3
  _geom_angle_publ_flag
 Se8 Bi4 Se8 85.09(6) 1_655 1_645 ?
 Se1 Bi4 Se8 162.43(8) . 1_645 ?
 Se1 Bi4 Se8 77.43(6) 3_766 1_655 ?
 Se1 Bi4 Se8 162.43(8) 1_545 1_655 ?
 Se1 Bi4 Se8 77.43(6) 3_766 1_645 ?
 Se1 Bi4 Se8 88.93(4) . 1_655 ?
 Se1 Bi4 Se8 88.93(4) 1_545 1_645 ?
 Se1 Bi4 Se1 91.92(7) 1_545 . ?
 Se1 Bi4 Se1 85.15(6) 3_766 . ?
 Se1 Bi4 Se1 85.15(6) 3_766 1_545 ?
 Cu2 Se5 Bi3 160.66(10) 3_666 . ?
 Cu2 Se5 Pb 96.57(8) 3_666 1_565 ?
 Cu2 Se5 Pb 96.57(8) 3_666 . ?
 Cu2 Se5 Bi2 72.58(7) 3_666 1_565 ?
 Cu2 Se5 Bi2 72.58(7) 3_666 . ?
 Bi3 Se5 Pb 97.50(6) . . ?
 Bi3 Se5 Pb 97.50(6) . 1_565 ?
 Bi3 Se5 Bi2 93.15(6) . . ?
 Bi3 Se5 Bi2 93.15(6) . 1_565 ?
 Pb Se5 Pb 86.36(6) . 1_565 ?
 Pb Se5 Bi2 169.15(9) 1_565 . ?
 Pb Se5 Bi2 94.348(19) . . ?
 Pb Se5 Bi2 169.15(9) . 1_565 ?
 Pb Se5 Bi2 94.349(19) 1_565 1_565 ?
 Bi2 Se5 Bi2 82.94(5) . 1_565 ?
 Cu2 Se6 Cu2 114.83(15) 3_656 3_666 ?
 Cu2 Se6 Cu2 61.63(8) 3_656 . ?
 Cu2 Se6 Cu2 61.63(8) 3_666 . ?
 Cu2 Se6 Bi2 83.99(11) 3_656 . ?
 Cu2 Se6 Bi2 83.99(11) 3_666 . ?
 Cu2 Se6 Bi2 106.85(13) . . ?
 Bi2 Se3 Bi2 94.99(7) 1_565 . ?
 Ag1 Se3 Bi2 93.90(7) . 1_565 ?
 Ag1 Se3 Bi2 93.90(7) . . ?
 Bi3 Se2 Bi3 86.44(5) 1_545 . ?
 Bi3 Se2 Pb 92.80(6) . . ?
 Bi3 Se2 Pb 92.80(6) 1_545 . ?
 Bi3 Se2 Bi1 173.40(10) . 1_445 ?
 Bi3 Se2 Bi1 173.40(10) 1_545 1_455 ?
 Bi3 Se2 Bi1 94.277(17) . 1_455 ?
 Bi3 Se2 Bi1 94.277(17) 1_545 1_445 ?
 Bi1 Se2 Pb 93.71(6) 1_445 . ?
 Bi1 Se2 Pb 93.71(6) 1_455 . ?
 Bi1 Se2 Bi1 84.27(5) 1_445 1_455 ?
 Bi3 Se4 Bi3 92.44(6) . 1_545 ?
 Bi3 Se4 Bi2 91.76(6) . . ?
 Bi3 Se4 Bi2 91.76(6) 1_545 . ?
 Bi3 Se4 Ag1 90.39(3) 1_545 1_545 ?
 Bi3 Se4 Ag1 168.35(10) . 1_545 ?
 Bi3 Se4 Ag1 90.39(3) . . ?
 Bi3 Se4 Ag1 168.35(10) 1_545 . ?
 Ag1 Se4 Bi3 96.24(7) 3_665 . ?
 Ag1 Se4 Bi3 96.24(7) 3_665 1_545 ?
 Ag1 Se4 Bi2 168.42(9) 3_665 . ?
 Ag1 Se4 Bi2 76.86(7) 1_545 . ?
 Ag1 Se4 Bi2 76.86(7) . . ?
 Ag1 Se4 Ag1 84.68(7) 1_545 . ?
 Ag1 Se4 Ag1 94.67(8) 3_665 . ?
 Ag1 Se4 Ag1 94.67(8) 3_665 1_545 ?
 Se6 Cu2 Se5 107.48(12) 3_656 3_666 ?
 Se6 Cu2 Se5 107.48(12) 3_666 3_666 ?
 Se6 Cu2 Se5 84.15(13) . 3_666 ?
 Se6 Cu2 Se6 118.37(8) 3_666 . ?
 Se6 Cu2 Se6 118.37(8) 3_656 . ?
 Se6 Cu2 Se6 114.83(15) 3_656 3_666 ?
 Se6 Cu2 Cu2 151.0(3) 3_666 3_656 ?
 Se6 Cu2 Cu2 57.95(11) . 3_656 ?
 Se6 Cu2 Cu2 151.0(3) 3_656 3_666 ?
 Se6 Cu2 Cu2 57.95(11) . 3_666 ?
 Se6 Cu2 Cu2 60.42(8) 3_666 3_666 ?
 Se6 Cu2 Cu2 60.42(8) 3_656 3_656 ?
 Cu2 Cu2 Se5 100.88(19) 3_656 3_666 ?
 Cu2 Cu2 Se5 100.88(19) 3_666 3_666 ?
 Cu2 Cu2 Cu2 108.5(2) 3_656 3_666 ?
 Bi1 Se7 Bi3 93.23(6) 1_545 3_665 ?
 Bi1 Se7 Bi3 93.23(6) . 3_665 ?
 Bi1 Se7 Bi1 93.86(6) 1_545 . ?
 Bi4 Se8 Bi4 85.09(6) 1_455 1_465 ?
 Bi4 Se8 Pb 150.89(9) 1_455 1_565 ?
 Bi4 Se8 Pb 150.90(9) 1_465 . ?
 Bi4 Se8 Pb 88.61(3) 1_465 1_565 ?
 Bi4 Se8 Pb 88.61(3) 1_455 . ?
 Pb Se8 Pb 83.21(6) 1_565 . ?
 Bi1 Se8 Bi4 108.65(6) 1_455 1_465 ?
 Bi1 Se8 Bi4 108.65(6) 1_455 1_455 ?
 Bi1 Se8 Pb 100.29(6) 1_455 . ?
 Bi1 Se8 Pb 100.29(6) 1_455 1_565 ?
 Se5 Bi3 Se2 86.84(6) . . ?
 Se5 Bi3 Se2 86.84(6) . 1_565 ?
 Se5 Bi3 Se4 92.69(6) . . ?
 Se5 Bi3 Se4 92.69(6) . 1_565 ?
 Se5 Bi3 Se7 177.93(6) . 3_665 ?
 Se2 Bi3 Se2 86.44(5) 1_565 . ?
 Se2 Bi3 Se7 91.65(6) 1_565 3_665 ?
 Se2 Bi3 Se7 91.65(6) . 3_665 ?
 Se4 Bi3 Se2 176.98(4) . 1_565 ?
 Se4 Bi3 Se2 176.98(4) 1_565 . ?
 Se4 Bi3 Se2 90.56(4) . . ?
 Se4 Bi3 Se2 90.56(4) 1_565 1_565 ?
 Se4 Bi3 Se4 92.44(6) 1_565 . ?
 Se4 Bi3 Se7 88.75(6) . 3_665 ?
 Se4 Bi3 Se7 88.75(6) 1_565 3_665 ?
 Se5 Pb Se5 86.36(6) . 1_545 ?
 Se5 Pb Se2 82.86(6) . . ?
 Se5 Pb Se2 82.86(6) 1_545 . ?
 Se5 Pb Se8 162.73(8) . 1_545 ?
 Se5 Pb Se8 92.65(4) 1_545 1_545 ?
 Se5 Pb Se8 92.65(4) . . ?
 Se5 Pb Se8 162.73(8) 1_545 . ?
 Se2 Pb Se8 79.91(6) . 1_545 ?
 Se2 Pb Se8 79.91(6) . . ?
 Se8 Pb Se8 83.21(6) 1_545 . ?
 Se5 Bi2 Se5 82.94(5) 1_545 . ?
 Se5 Bi2 Se4 82.05(6) . . ?
 Se5 Bi2 Se4 82.05(6) 1_545 . ?
 Se6 Bi2 Se5 90.63(6) . . ?
 Se6 Bi2 Se5 90.63(6) . 1_545 ?
 Se6 Bi2 Se3 96.42(7) . . ?
 Se6 Bi2 Se3 96.42(7) . 1_545 ?
 Se6 Bi2 Se4 170.21(6) . . ?
 Se3 Bi2 Se5 170.47(7) 1_545 . ?
 Se3 Bi2 Se5 170.47(7) . 1_545 ?
 Se3 Bi2 Se5 90.56(4) . . ?
 Se3 Bi2 Se5 90.56(4) 1_545 1_545 ?
 Se3 Bi2 Se3 94.99(7) 1_545 . ?
 Se3 Bi2 Se4 90.18(6) . . ?
 Se3 Bi2 Se4 90.18(6) 1_545 . ?
 Se3 Ag1 Se4 174.46(11) . 3_665 ?
 Se3 Ag1 Se4 98.74(8) . . ?
 Se3 Ag1 Se4 98.74(8) . 1_565 ?
 Se4 Ag1 Se4 85.33(8) 3_665 . ?
 Se4 Ag1 Se4 85.33(8) 3_665 1_565 ?
 Se4 Ag1 Se4 84.68(7) . 1_565 ?
 Se2 Bi1 Se2 84.27(5) 1_665 1_655 ?
 Se7 Bi1 Se2 175.03(5) . 1_665 ?
 Se7 Bi1 Se2 175.03(5) 1_565 1_655 ?
 Se7 Bi1 Se2 90.92(4) 1_565 1_665 ?
 Se7 Bi1 Se2 90.92(4) . 1_655 ?
 Se7 Bi1 Se7 93.86(6) . 1_565 ?
 Se8 Bi1 Se2 86.09(6) 1_655 1_665 ?
 Se8 Bi1 Se2 86.09(6) 1_655 1_655 ?
 Se8 Bi1 Se7 92.34(6) 1_655 1_565 ?
 Se8 Bi1 Se7 92.34(6) 1_655 . ?
 Bi4 Se1 Bi4 94.85(6) 3_766 . ?
 Bi4 Se1 Bi4 94.85(6) 3_766 1_565 ?
 Bi4 Se1 Bi4 91.92(7) . 1_565 ?
